# Supplementary material for: Parallel trait adaptation across opposing thermal environments in experimental Drosophila melanogaster populations
Source: PubMed Central journal article supplement (PMC4755034; doi:10.1111/evo.12705), 2015-07-14
Supplement: EVO-69-1745-s001.pdf [file EVO-69-1745-s001.pdf]

Table S1. Results of ANOVA (car R package, see methods) testing for all traits in both assayed generations (Cold 34 & Hot 59 or Cold 44 & Hot 75). Predictor variables are as follows. Pop = population (Base, Cold or Hot), Env = environment (18° to 28° C, 10° to 20° C or constant 23° C), CGE = common garden experiment (constant 15° C or constant 23° C). PosBlock = blocking term for position in shaker for heatshock assays (3 blocks = 2 rightmost, 4 central and 2 leftmost positions). The colon indicates interaction terms.

| Trait        | Predictor   | Df | Cold 34 : Hot 59 |        | Cold 44 : Hot 75 |        |
|--------------|-------------|----|------------------|--------|------------------|--------|
|              |             |    | Chisq            | P      | Chisq            | P      |
| Fitness      | Env         | 2  | NA               | NA     | 1876.8           | <0.001 |
|              | Population  | 2  | NA               | NA     | 50.1             | <0.001 |
|              | Env:Pop     | 4  | NA               | NA     | 717.4            | <0.001 |
| Heatshock    | PosBlock    | 2  | 1.2              | 0.563  | 16.5             | <0.001 |
|              | CGE         | 1  | 803.6            | <0.001 | 82.6             | <0.001 |
|              | Pop         | 2  | 23.3             | <0.001 | 52.0             | <0.001 |
|              | Sex         | 1  | 19.2             | <0.001 | 39.8             | <0.001 |
|              | CGE:Pop     | 2  | 0.9              | 0.648  | 9.1              | 0.011  |
|              | CGE:Sex     | 1  | 102.5            | <0.001 | 0.1              | 0.708  |
|              | Pop:Sex     | 2  | 1.5              | 0.470  | 2.7              | 0.260  |
|              | CGE:Pop:Sex | 2  | 7.7              | 0.022  | 14.1             | <0.001 |
| Coldshock    | CGE         | 1  | 1155.7           | <0.001 | 117.1            | <0.001 |
|              | Pop         | 2  | 9.0              | 0.011  | 17.2             | <0.001 |
|              | Sex         | 1  | 30.6             | <0.001 | 16.5             | <0.001 |
|              | CGE:Pop     | 2  | 12.5             | 0.002  | 98.4             | <0.001 |
|              | CGE:Sex     | 1  | 2.6              | 0.109  | 2.2              | 0.139  |
|              | Pop:Sex     | 2  | 2.1              | 0.356  | 16.8             | <0.001 |
|              | CGE:Pop:Sex | 2  | 0.5              | 0.783  | 6.3              | 0.042  |
| Development  | CGE         | 1  | 25281.5          | <0.001 | NA               | NA     |
|              | Pop         | 2  | 304.4            | <0.001 | 88.7             | <0.001 |
|              | CGE:Pop     | 2  | 52.6             | <0.001 | NA               | NA     |
| Wing area    | CGE         | 1  | 1862.2           | <0.001 | 9703.2           | <0.001 |
|              | Pop         | 2  | 16.4             | <0.001 | 2.5              | 0.286  |
|              | Sex         | 1  | 2256.4           | <0.001 | 3686.8           | <0.001 |
|              | CGE:Pop     | 2  | 76.2             | <0.001 | 58.5             | <0.001 |
|              | CGE:Sex     | 1  | 5.9              | 0.015  | 22.5             | <0.001 |
|              | Pop:Sex     | 2  | 5.2              | 0.074  | 1.3              | 0.530  |
|              | CGE:Pop:Sex | 2  | 2.5              | 0.281  | 0.8              | 0.684  |
| Tibia length | CGE         | 1  | 140.1            | <0.001 | 2265.8           | <0.001 |
|              | Pop         | 2  | 24.4             | <0.001 | 11.2             | 0.004  |
|              | Sex         | 1  | 745.6            | <0.001 | 912.1            | <0.001 |
|              | CGE:Pop     | 2  | 132.2            | <0.001 | 94.3             | <0.001 |
|              | CGE:Sex     | 1  | 3.0              | 0.084  | 1.4              | 0.232  |
|              | Pop:Sex     | 2  | 2.2              | 0.333  | 6.5              | 0.039  |
|              | CGE:Pop:Sex | 2  | 1.6              | 0.439  | 2.4              | 0.299  |

Table S2. Results of ANOVA (car R package, see methods) testing for all traits except fitness after adjusting all values and adding the assayed generations as an additional fixed factor (Assay). Predictor variables are as follows. Pop = population (Base, Cold or Hot), CGE = common garden experiment (constant 15° C or constant 23° C), Assay = generation of evolved populations (i.e. Cold 34 & Hot 59, Cold 44 & Hot 75). PosBlock = blocking term for position in shaker for heatshock assays (3 blocks = 2 rightmost, 4 central and 2 leftmost positions). For developmental time (Development) measurements were limited to the 23° C CGE in the 2<sup>nd</sup> assayed generation and sex was not distinguished, such that a simpler model was fit to this data. The colon indicates interaction terms.

| Predictor         | Df | Heatshock |        | Coldshock |        | Development |        | Wing area |        | Tibia length |        |
|-------------------|----|-----------|--------|-----------|--------|-------------|--------|-----------|--------|--------------|--------|
|                   |    | Chisq     | P      | Chisq     | P      | Chisq       | P      | Chisq     | P      | Chisq        | P      |
| PosBlock          | 2  | 2.5       | 0.281  | NA        | NA     | NA          | NA     | NA        | NA     | NA           | NA     |
| Assay             | 1  | 8.2       | 0.004  | 18.7      | <0.001 | 18.7        | <0.001 | 295.6     | <0.001 | 295.6        | <0.001 |
| CGE               | 1  | 9.5       | 0.002  | 212.4     | <0.001 | 212.4       | NA     | 31.6      | <0.001 | 31.6         | <0.001 |
| Pop               | 1  | 0.1       | 0.820  | 12.6      | <0.001 | 12.6        | <0.001 | 1.1       | 0.289  | 1.1          | 0.289  |
| Sex               | 1  | 0.0       | 0.870  | 3.7       | 0.056  | 3.7         | NA     | 17.0      | <0.001 | 17.0         | <0.001 |
| Assay:CGE         | 1  | 3.3       | 0.068  | 67.9      | <0.001 | 67.9        | NA     | 197.2     | <0.001 | 197.2        | <0.001 |
| Assay:Pop         | 1  | 3.0       | 0.086  | 0.5       | 0.485  | 0.5         | 0.006  | 307.2     | <0.001 | 307.2        | <0.001 |
| CGE:Pop           | 1  | 2.2       | 0.136  | 1.2       | 0.279  | 1.2         | NA     | 0.3       | 0.567  | 0.3          | 0.567  |
| Assay:Sex         | 1  | 1.9       | 0.167  | 0.7       | 0.415  | 0.7         | NA     | 0.5       | 0.499  | 0.5          | 0.499  |
| CGE:Sex           | 1  | 18.7      | <0.001 | 5.2       | 0.022  | 5.2         | NA     | 0.0       | 0.982  | 0.0          | 0.982  |
| Pop:Sex           | 1  | 1.0       | 0.328  | 5.4       | 0.021  | 5.4         | NA     | 1.1       | 0.288  | 1.1          | 0.288  |
| Assay:CGE:Pop     | 1  | 5.3       | 0.022  | 15.4      | <0.001 | 15.4        | NA     | 242.6     | <0.001 | 242.6        | <0.001 |
| Assay:CGE:Sex     | 1  | 42.6      | <0.001 | 4.6       | 0.032  | 4.6         | NA     | 8.4       | 0.004  | 8.4          | 0.004  |
| Assay:Pop:Sex     | 1  | 3.9       | 0.047  | 14.2      | <0.001 | 14.2        | NA     | 2.5       | 0.116  | 2.5          | 0.116  |
| CGE:Pop:Sex       | 1  | 4.0       | 0.046  | 3.5       | 0.062  | 3.5         | NA     | 1.3       | 0.251  | 1.3          | 0.251  |
| Assay:CGE:Pop:Sex | 1  | 0.9       | 0.336  | 0.5       | 0.470  | 0.5         | NA     | 2.9       | 0.086  | 2.9          | 0.086  |

Table S2. Results of ANOVA (car R package, see methods) testing for all traits except fitness after adjusting all values and adding the assayed generations as an additional fixed factor (Assay). Predictor variables are as follows. Pop = population (Base, Cold or Hot), CGE = common garden experiment (constant 15° C or constant 23° C), Assay = generation of evolved populations (i.e. Cold 34 & Hot 59, Cold 44 & Hot 75). PosBlock = blocking term for position in shaker for heatshock assays (3 blocks = 2 rightmost, 4 central and 2 leftmost positions). For developmental time (Development) measurements were limited to the 23° C CGE in the 2<sup>nd</sup> assayed generation and sex was not distinguished, such that a simpler model was fit to this data. The colon indicates interaction terms.

| Predictor         | Df | Heatshock |        | Coldshock |        | Development |        | Wing area |        | Tibia length |        |
|-------------------|----|-----------|--------|-----------|--------|-------------|--------|-----------|--------|--------------|--------|
|                   |    | Chisq     | P      | Chisq     | P      | Chisq       | P      | Chisq     | P      | Chisq        | P      |
| PosBlock          | 2  | 2.5       | 0.281  | NA        | NA     | NA          | NA     | NA        | NA     | NA           | NA     |
| Assay             | 1  | 8.2       | 0.004  | 18.7      | <0.001 | 18.7        | <0.001 | 295.6     | <0.001 | 295.6        | <0.001 |
| CGE               | 1  | 9.5       | 0.002  | 212.4     | <0.001 | 212.4       | NA     | 31.6      | <0.001 | 31.6         | <0.001 |
| Pop               | 1  | 0.1       | 0.820  | 12.6      | <0.001 | 12.6        | <0.001 | 1.1       | 0.289  | 1.1          | 0.289  |
| Sex               | 1  | 0.0       | 0.870  | 3.7       | 0.056  | 3.7         | NA     | 17.0      | <0.001 | 17.0         | <0.001 |
| Assay:CGE         | 1  | 3.3       | 0.068  | 67.9      | <0.001 | 67.9        | NA     | 197.2     | <0.001 | 197.2        | <0.001 |
| Assay:Pop         | 1  | 3.0       | 0.086  | 0.5       | 0.485  | 0.5         | 0.006  | 307.2     | <0.001 | 307.2        | <0.001 |
| CGE:Pop           | 1  | 2.2       | 0.136  | 1.2       | 0.279  | 1.2         | NA     | 0.3       | 0.567  | 0.3          | 0.567  |
| Assay:Sex         | 1  | 1.9       | 0.167  | 0.7       | 0.415  | 0.7         | NA     | 0.5       | 0.499  | 0.5          | 0.499  |
| CGE:Sex           | 1  | 18.7      | <0.001 | 5.2       | 0.022  | 5.2         | NA     | 0.0       | 0.982  | 0.0          | 0.982  |
| Pop:Sex           | 1  | 1.0       | 0.328  | 5.4       | 0.021  | 5.4         | NA     | 1.1       | 0.288  | 1.1          | 0.288  |
| Assay:CGE:Pop     | 1  | 5.3       | 0.022  | 15.4      | <0.001 | 15.4        | NA     | 242.6     | <0.001 | 242.6        | <0.001 |
| Assay:CGE:Sex     | 1  | 42.6      | <0.001 | 4.6       | 0.032  | 4.6         | NA     | 8.4       | 0.004  | 8.4          | 0.004  |
| Assay:Pop:Sex     | 1  | 3.9       | 0.047  | 14.2      | <0.001 | 14.2        | NA     | 2.5       | 0.116  | 2.5          | 0.116  |
| CGE:Pop:Sex       | 1  | 4.0       | 0.046  | 3.5       | 0.062  | 3.5         | NA     | 1.3       | 0.251  | 1.3          | 0.251  |
| Assay:CGE:Pop:Sex | 1  | 0.9       | 0.336  | 0.5       | 0.470  | 0.5         | NA     | 2.9       | 0.086  | 2.9          | 0.086  |

Table S3. Results of contrasts (phia R package, see methods) testing all pairwise population differences given sex and CGE for all traits in both assayed generations (Cold 34 & Hot 59 or Cold 44 & Hot 75). Population = pairwise population comparison, CGE/Env = place of assay (either constant 15° C, constant 23° C, 18° to 28° C or 10° to 20° C).

| Trait       | Sex    | CGE/Env  | Population | Df | Cold 34 : Hot 59 |        | Cold 44 : Hot 75 |        |
|-------------|--------|----------|------------|----|------------------|--------|------------------|--------|
|             |        |          |            |    | Chisq            | P      | Chisq            | P      |
| Fitness     | Both   | 10 to 20 | Base-Cold  | 1  | NA               | NA     | 54.5             | <0.001 |
|             | Both   | 11 to 20 | Base-Hot   | 1  | NA               | NA     | 28.9             | <0.001 |
|             | Both   | 12 to 20 | Cold-Hot   | 1  | NA               | NA     | 4.3              | 0.117  |
|             | Both   | 23       | Base-Cold  | 1  | NA               | NA     | 4.1              | 0.117  |
|             | Both   | 23       | Base-Hot   | 1  | NA               | NA     | 1.8              | 0.175  |
|             | Both   | 23       | Cold-Hot   | 1  | NA               | NA     | 11.6             | 0.003  |
|             | Both   | 18 to 28 | Base-Cold  | 1  | NA               | NA     | 27.1             | <0.001 |
|             | Both   | 18 to 28 | Base-Hot   | 1  | NA               | NA     | 151.5            | <0.001 |
|             | Both   | 28 to 28 | Cold-Hot   | 1  | NA               | NA     | 52.6             | <0.001 |
| Heatshock   | Female | 15       | Base-Cold  | 1  | 15.6             | <0.001 | 7.8              | 0.037  |
|             | Female | 15       | Base-Hot   | 1  | 12.7             | 0.004  | 5.8              | 0.081  |
|             | Female | 15       | Cold-Hot   | 1  | 0.1              | 1.000  | 0.1              | 0.709  |
|             | Male   | 15       | Base-Cold  | 1  | 5.4              | 0.119  | 25.9             | <0.001 |
|             | Male   | 15       | Base-Hot   | 1  | 8.7              | 0.026  | 40.6             | <0.001 |
|             | Male   | 15       | Cold-Hot   | 1  | 0.4              | 1.000  | 1.8              | 0.394  |
|             | Female | 23       | Base-Cold  | 1  | 2.1              | 0.584  | 43.9             | <0.001 |
|             | Female | 23       | Base-Hot   | 1  | 13.5             | 0.003  | 16.0             | <0.001 |
|             | Female | 23       | Cold-Hot   | 1  | 4.7              | 0.149  | 7.0              | 0.049  |
|             | Male   | 23       | Base-Cold  | 1  | 12.1             | 0.004  | 13.6             | 0.002  |
|             | Male   | 23       | Base-Hot   | 1  | 8.2              | 0.029  | 4.8              | 0.112  |
|             | Male   | 23       | Cold-Hot   | 1  | 0.4              | 1.000  | 2.3              | 0.394  |
| Coldshock   | Female | 15       | Base-Cold  | 1  | 0.1              | 1.000  | 0.8              | 1.000  |
|             | Female | 15       | Base-Hot   | 1  | 1.7              | 0.963  | 1.1              | 1.000  |
|             | Female | 15       | Cold-Hot   | 1  | 2.6              | 0.725  | 3.7              | 0.386  |
|             | Male   | 15       | Base-Cold  | 1  | 3.2              | 0.573  | 2.1              | 0.755  |
|             | Male   | 15       | Base-Hot   | 1  | 1.4              | 0.963  | 3.0              | 0.512  |
|             | Male   | 15       | Cold-Hot   | 1  | 8.8              | 0.033  | 0.1              | 1.000  |
|             | Female | 23       | Base-Cold  | 1  | 4.7              | 0.264  | 4.8              | 0.222  |
|             | Female | 23       | Base-Hot   | 1  | 9.2              | 0.029  | 61.7             | <0.001 |
|             | Female | 23       | Cold-Hot   | 1  | 0.8              | 1.000  | 32.3             | <0.001 |
|             | Male   | 23       | Base-Cold  | 1  | 2.2              | 0.832  | 29.8             | <0.001 |
|             | Male   | 23       | Base-Hot   | 1  | 5.2              | 0.224  | 41.3             | <0.001 |
|             | Male   | 23       | Cold-Hot   | 1  | 0.7              | 1.000  | 1.0              | 1.000  |
| Development | Both   | 15       | Base-Cold  | 1  | 29.7             | <0.001 | NA               | NA     |
|             | Both   | 15       | Base-Hot   | 1  | 131.0            | <0.001 | NA               | NA     |
|             | Both   | 15       | Cold-Hot   | 1  | 35.2             | <0.001 | NA               | NA     |
|             | Both   | 23       | Base-Cold  | 1  | 84.1             | <0.001 | 22.3             | <0.001 |
|             | Both   | 23       | Base-Hot   | 1  | 326.7            | <0.001 | 88.4             | <0.001 |
|             | Both   | 23       | Cold-Hot   | 1  | 78.8             | <0.001 | 24.6             | <0.001 |
| Wing area   | Female | 15       | Base-Cold  | 1  | 16.9             | <0.001 | 0.9              | 1.000  |
|             | Female | 15       | Base-Hot   | 1  | 23.8             | <0.001 | 0.0              | 1.000  |
|             | Female | 15       | Cold-Hot   | 1  | 0.6              | 1.000  | 1.1              | 1.000  |
|             | Male   | 15       | Base-Cold  | 1  | 6.7              | 0.049  | 0.8              | 1.000  |
|             | Male   | 15       | Base-Hot   | 1  | 8.6              | 0.023  | 0.1              | 1.000  |
|             | Male   | 15       | Cold-Hot   | 1  | 0.1              | 1.000  | 0.3              | 1.000  |
|             | Female | 23       | Base-Cold  | 1  | 0.7              | 1.000  | 8.1              | 0.044  |
|             | Female | 23       | Base-Hot   | 1  | 9.9              | 0.013  | 0.5              | 1.000  |

|              |        |    |           |   |      |        |      |        |
|--------------|--------|----|-----------|---|------|--------|------|--------|
|              | Female | 23 | Cold-Hot  | 1 | 15.9 | <0.001 | 12.8 | 0.004  |
|              | Male   | 23 | Base-Cold | 1 | 2.2  | 0.553  | 3.6  | 0.534  |
|              | Male   | 23 | Base-Hot  | 1 | 8.7  | 0.023  | 2.5  | 0.937  |
|              | Male   | 23 | Cold-Hot  | 1 | 19.7 | <0.001 | 11.9 | 0.006  |
| Tibia length | Female | 15 | Base-Cold | 1 | 16.1 | <0.001 | 0.8  | 1.000  |
|              | Female | 15 | Base-Hot  | 1 | 29.1 | <0.001 | 1.1  | 1.000  |
|              | Female | 15 | Cold-Hot  | 1 | 1.9  | 0.296  | 0.0  | 1.000  |
|              | Male   | 15 | Base-Cold | 1 | 8.8  | 0.015  | 2.6  | 0.725  |
|              | Male   | 15 | Base-Hot  | 1 | 20.4 | <0.001 | 1.4  | 1.000  |
|              | Male   | 15 | Cold-Hot  | 1 | 2.4  | 0.296  | 0.2  | 1.000  |
|              | Female | 23 | Base-Cold | 1 | 2.7  | 0.296  | 26.5 | <0.001 |
|              | Female | 23 | Base-Hot  | 1 | 11.3 | 0.005  | 1.0  | 1.000  |
|              | Female | 23 | Cold-Hot  | 1 | 25.2 | <0.001 | 37.8 | <0.001 |
|              | Male   | 23 | Base-Cold | 1 | 4.0  | 0.183  | 6.4  | 0.094  |
|              | Male   | 23 | Base-Hot  | 1 | 13.7 | 0.001  | 7.1  | 0.070  |
|              | Male   | 23 | Cold-Hot  | 1 | 32.6 | <0.001 | 26.9 | <0.001 |

Table S4. Results of contrasts (phia R package, see methods) testing for differences across the two assayed generations (Cold 34 & Hot 59 or Cold 44 & Hot 75) for each trait given population, sex and CGE. CGE = common garden experiment (constant 15° C, constant 23° C), Assay I = Cold 34 & Hot 59, Assay II = Cold 44 & Hot 75.

| Trait        | Sex    | Population | CGE | Assay | Df | Chisq | P      |
|--------------|--------|------------|-----|-------|----|-------|--------|
| Heatshock    | Female | Cold       | 15  | I-II  | 1  | 5.5   | 0.078  |
|              | Female | Hot        | 15  | I-II  | 1  | 7.5   | 0.038  |
|              | Male   | Cold       | 15  | I-II  | 1  | 6.5   | 0.055  |
|              | Male   | Hot        | 15  | I-II  | 1  | 13.6  | 0.002  |
|              | Female | Cold       | 23  | I-II  | 1  | 35.2  | <0.001 |
|              | Female | Hot        | 23  | I-II  | 1  | 1.1   | 0.898  |
|              | Male   | Cold       | 23  | I-II  | 1  | 0.0   | 1.000  |
|              | Male   | Hot        | 23  | I-II  | 1  | 0.4   | 1.000  |
| Coldshock    | Female | Cold       | 15  | I-II  | 1  | 0.7   | 1.000  |
|              | Female | Hot        | 15  | I-II  | 1  | 0.1   | 1.000  |
|              | Male   | Cold       | 15  | I-II  | 1  | 0.6   | 1.000  |
|              | Male   | Hot        | 15  | I-II  | 1  | 15.3  | <0.001 |
|              | Female | Cold       | 23  | I-II  | 1  | 0.3   | 1.000  |
|              | Female | Hot        | 23  | I-II  | 1  | 34.4  | <0.001 |
|              | Male   | Cold       | 23  | I-II  | 1  | 26.9  | <0.001 |
|              | Male   | Hot        | 23  | I-II  | 1  | 27.4  | <0.001 |
| Development  | Both   | Cold       | 23  | I-II  | 1  | 2.1   | 0.146  |
|              | Both   | Hot        | 23  | I-II  | 1  | 39.8  | <0.001 |
| Wing area    | Female | Cold       | 15  | I-II  | 1  | 57.4  | <0.001 |
|              | Female | Hot        | 15  | I-II  | 1  | 57.9  | <0.001 |
|              | Male   | Cold       | 15  | I-II  | 1  | 38.7  | <0.001 |
|              | Male   | Hot        | 15  | I-II  | 1  | 37.5  | <0.001 |
|              | Female | Cold       | 23  | I-II  | 1  | 37.3  | <0.001 |
|              | Female | Hot        | 23  | I-II  | 1  | 51.4  | <0.001 |
|              | Male   | Cold       | 23  | I-II  | 1  | 53.9  | <0.001 |
|              | Male   | Hot        | 23  | I-II  | 1  | 109.6 | <0.001 |
| Tibia length | Female | Cold       | 15  | I-II  | 1  | 80.1  | <0.001 |
|              | Female | Hot        | 15  | I-II  | 1  | 139.4 | <0.001 |
|              | Male   | Cold       | 15  | I-II  | 1  | 70.3  | <0.001 |
|              | Male   | Hot        | 15  | I-II  | 1  | 120.8 | <0.001 |
|              | Female | Cold       | 23  | I-II  | 1  | 112.6 | <0.001 |
|              | Female | Hot        | 23  | I-II  | 1  | 68.9  | <0.001 |
|              | Male   | Cold       | 23  | I-II  | 1  | 67.6  | <0.001 |
|              | Male   | Hot        | 23  | I-II  | 1  | 149.4 | <0.001 |

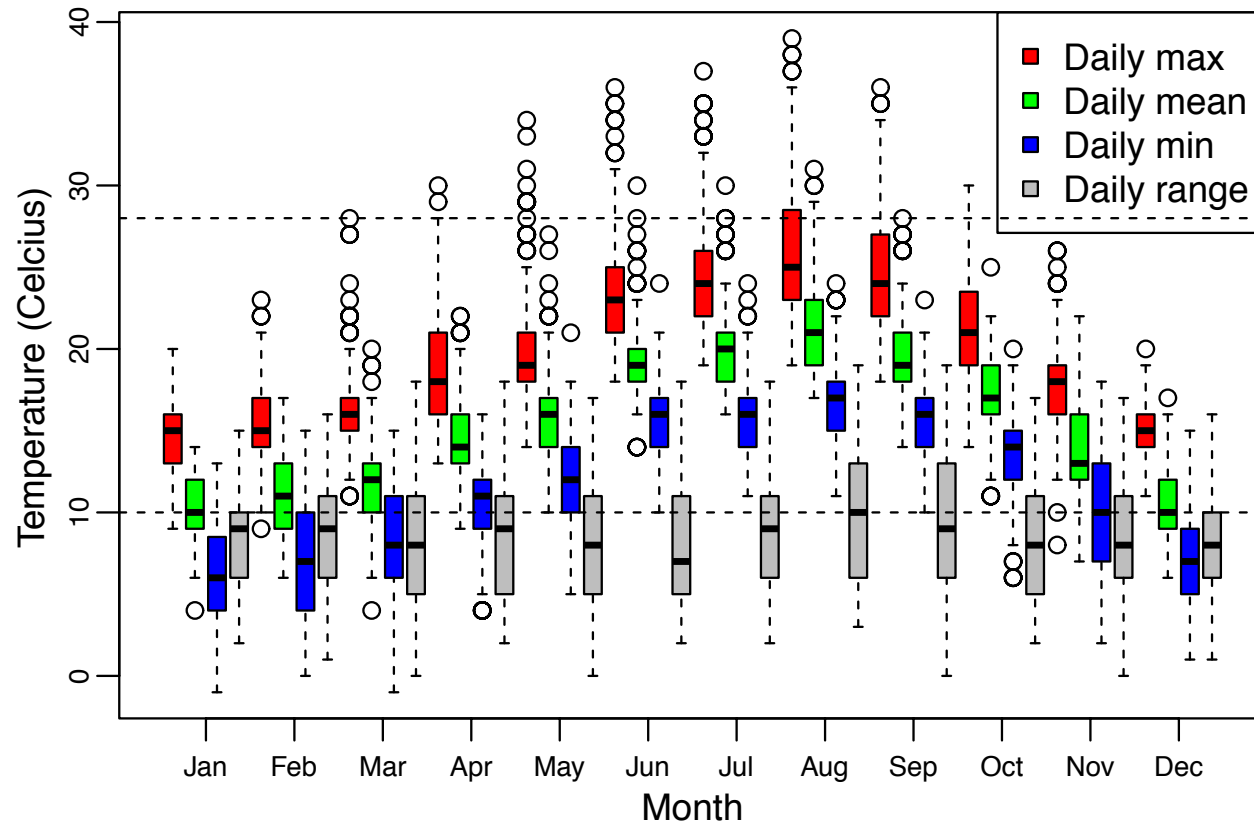

Figure S1. Boxplot showing the maximum (red boxes), minimum (blue boxes), mean (green boxes) and range (gray boxes) of daily temperatures by month for the native habitat of the progenitor population - Póvoa de Varzim, Portugal. The dashed black lines show the maximum and minimum temperatures in the experimental environments. The data is based on daily records collected between 01.08.2003 and 31.08.2008 – corresponding to the 5 years prior to the collection of the experimental founder lines – and was obtained from the Weather Underground website (<http://www.wunderground.com/history/>). Regarding the rate of temperature change in this area, we note that low temperatures typically occur shortly after sunrise, with high temperatures being reached few hours after midday (Ackerman and Knox 2013). Thus a conservative estimate of the maximum rate of temperature change in the Póvoa de Varzim area is on the order of  $\sim 0.067^{\circ}\text{Cmin}^{-1}$  (i.e.  $16^{\circ}\text{C}$  change over 4 hrs from 08:00 to 12:00, which is the highest observed temperature change from the month with the shortest period between sunrise and midday (December)). Despite being a conservative estimate, this is less than half of the lower limit of the rate of temperature change estimated in the experimental environments (see main text).

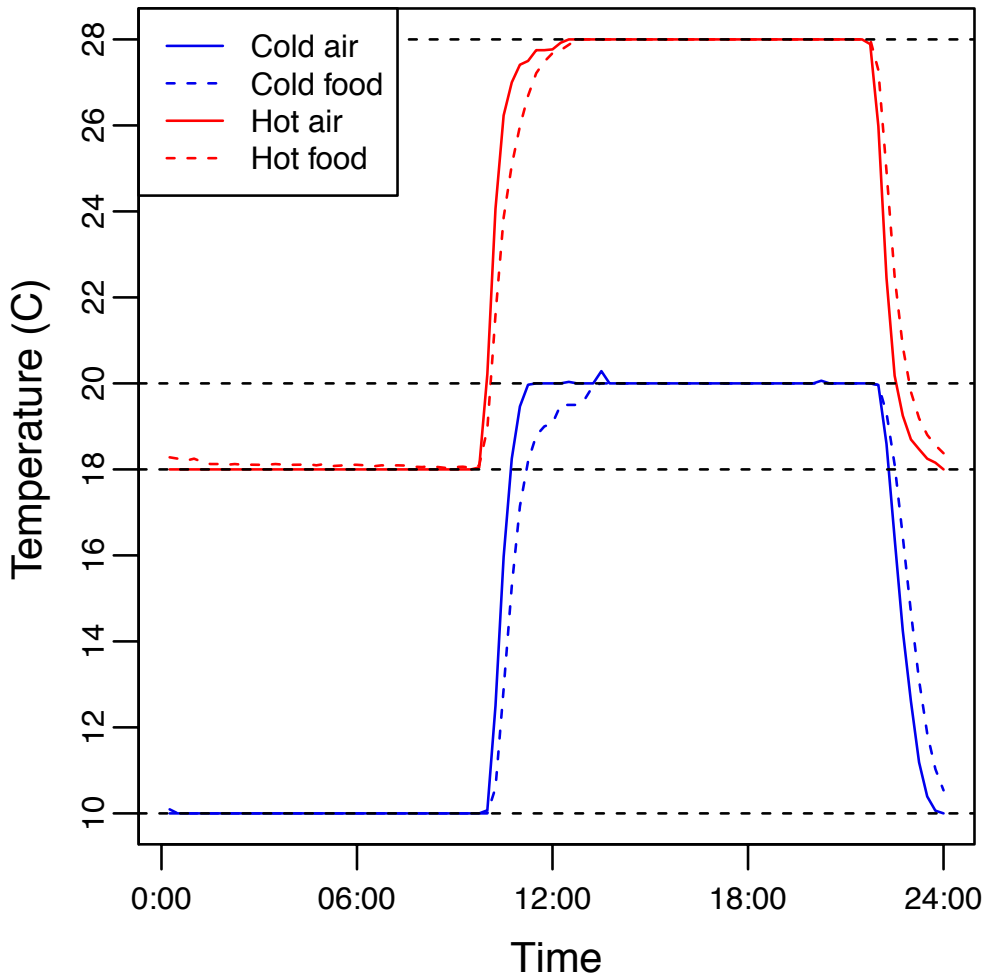

Figure S2. A 24hr time-series showing the temperature cycles maintained in the hot (red) and cold (blue) experimental environments. Data were collected using iButton® thermochronometers (see [www.maximintegrated.com/en/products/comms/ibutton/DS1921G.html](http://www.maximintegrated.com/en/products/comms/ibutton/DS1921G.html) for model information). The measurements were made within bottles, with one iButton placed in the food at the base of the bottle (solid lines) and another adhered to the lid above the food (i.e. measuring air temperature in the bottle; dashed lines), thereby recording the temperatures experienced in the two mediums. Measurements were based on 2 bottles for each temperature regime (hot = 18° to 28° C, cold = 10° to 20° C). The dashed black lines show the modal temperatures for both environments. Temperatures were recorded every two minutes and the subsequent data were averaged over successive 15 minute intervals.



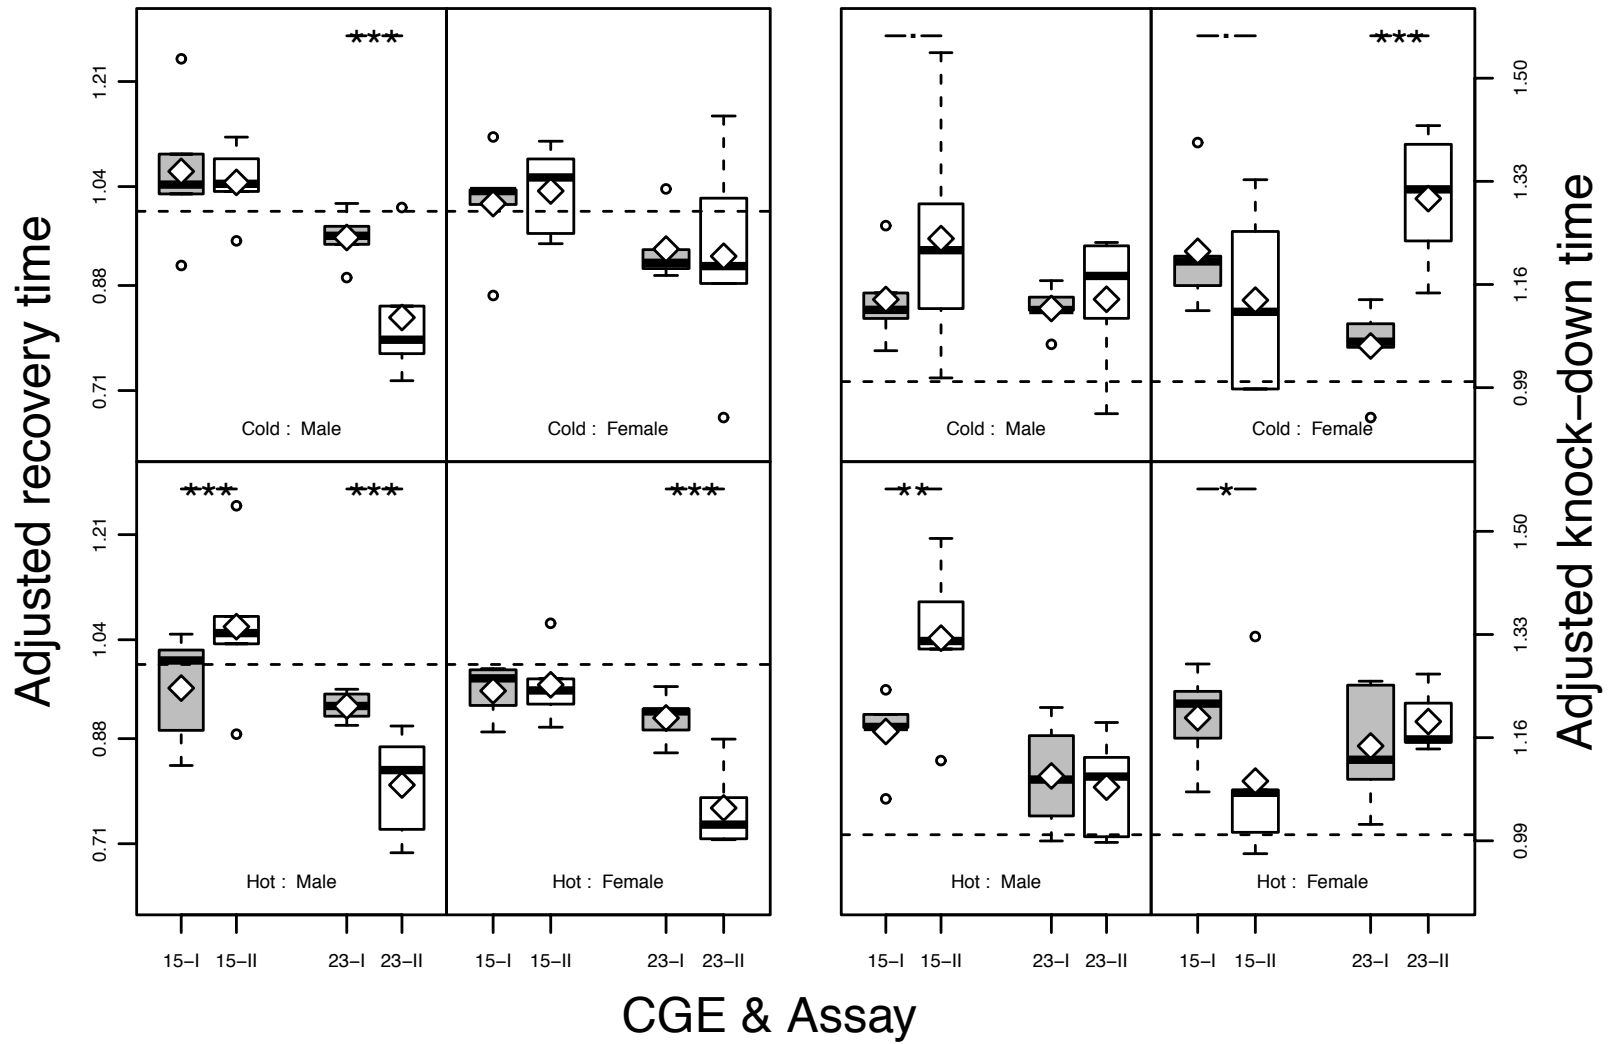

Figure S3. Box plot showing the adjusted of recovery time (2 left-most columns) and knock down time (2 right-most columns) from acute cold and heat stress, respectively. Sex and population are listed in the panels, CGE and assay (I=F34 cold & F59 hot, II=F43 cold & F75 hot) in the x-labels. Significance for the inter-assay comparisons is shown at the top of each panel. (“.” <= 0.1, “\*” <= 0.05, “\*\*\*” <= 0.01, “\*\*\*\*” <=0.001)

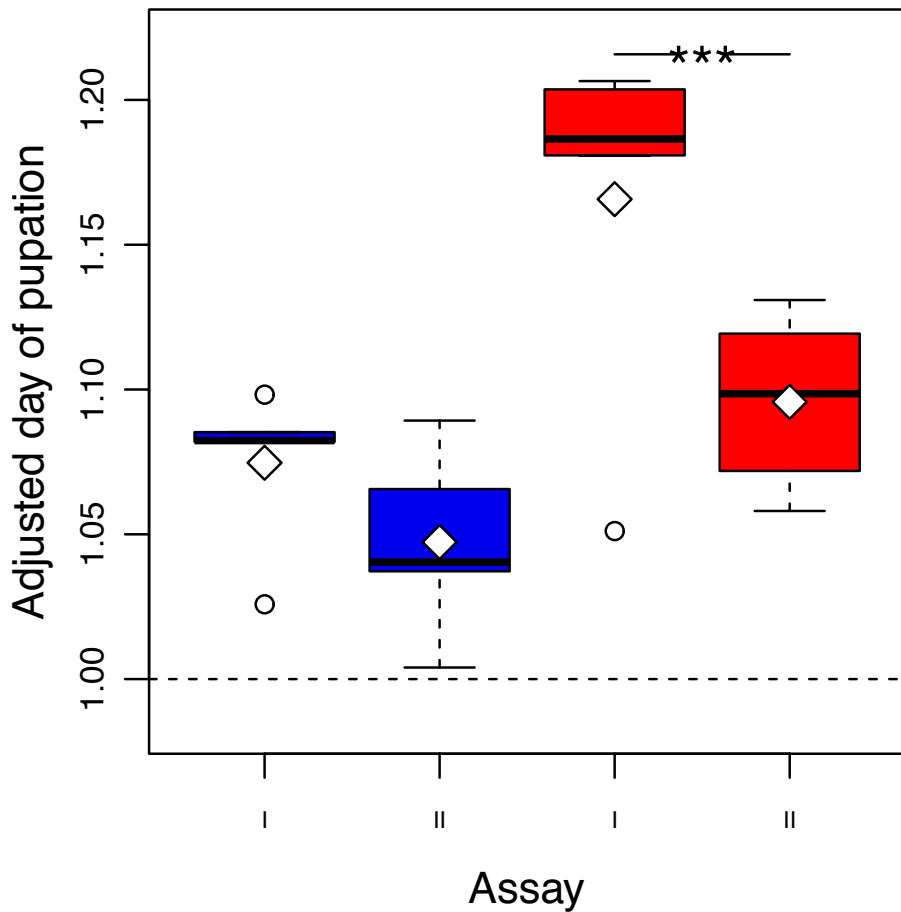

Figure S4. Box plot of adjusted developmental time for hot (red) and cold (blue populations). The x-labels denote the assay number (I=F34 cold & F59 hot, II=F43 cold & F75 hot). Only data for the 23° C CGE was available for both assayed generations. Significance for the inter-assay comparisons is shown at the top of each panel ("." <= 0.1, "\*" <= 0.05, "\*\*\*" <= 0.01, "\*\*\*\*" <=0.001).

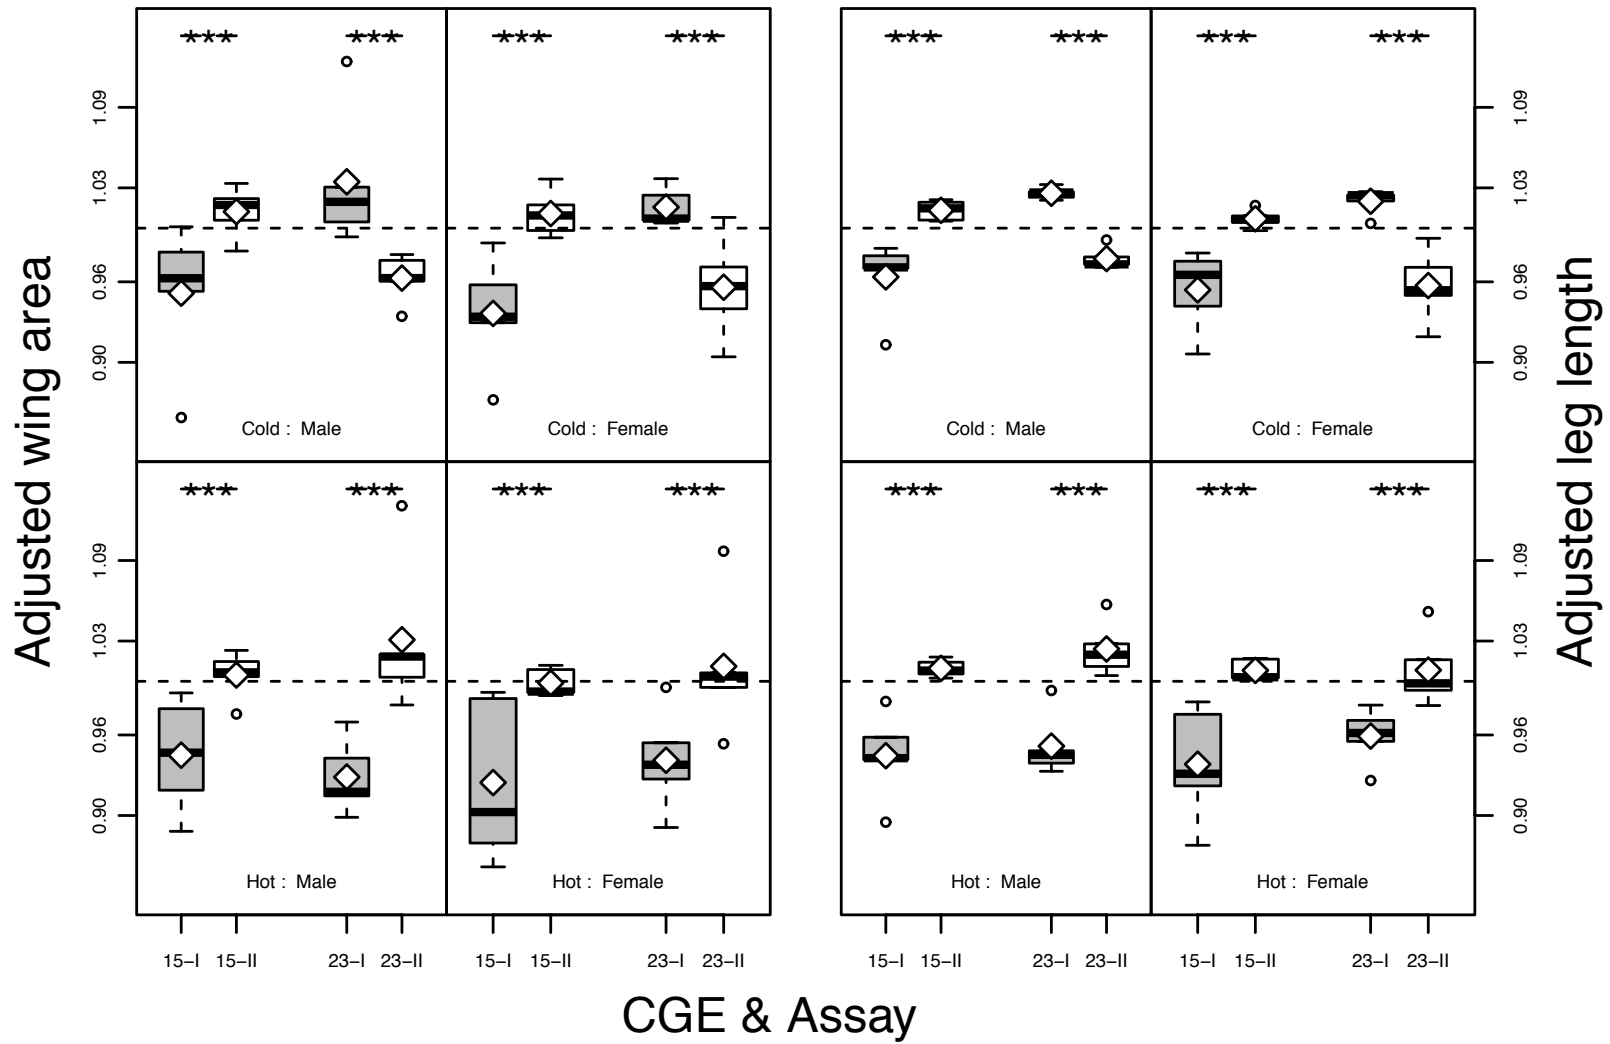

Figure S5. Box plot showing the adjusted of wing area (2 left-most columns) and rear tibia length (4 right-most columns) from acute cold and heat stress, respectively. Sex and population are listed in the panels, CGE and assay (I=F34 cold & F59 hot, II=F43 cold & F75 hot) in the x-labels. (". "  $\leq 0.1$ , "\*"  $\leq 0.05$ , "\*\*\*"  $\leq 0.01$ , "\*\*\*\*"  $\leq 0.001$ ).

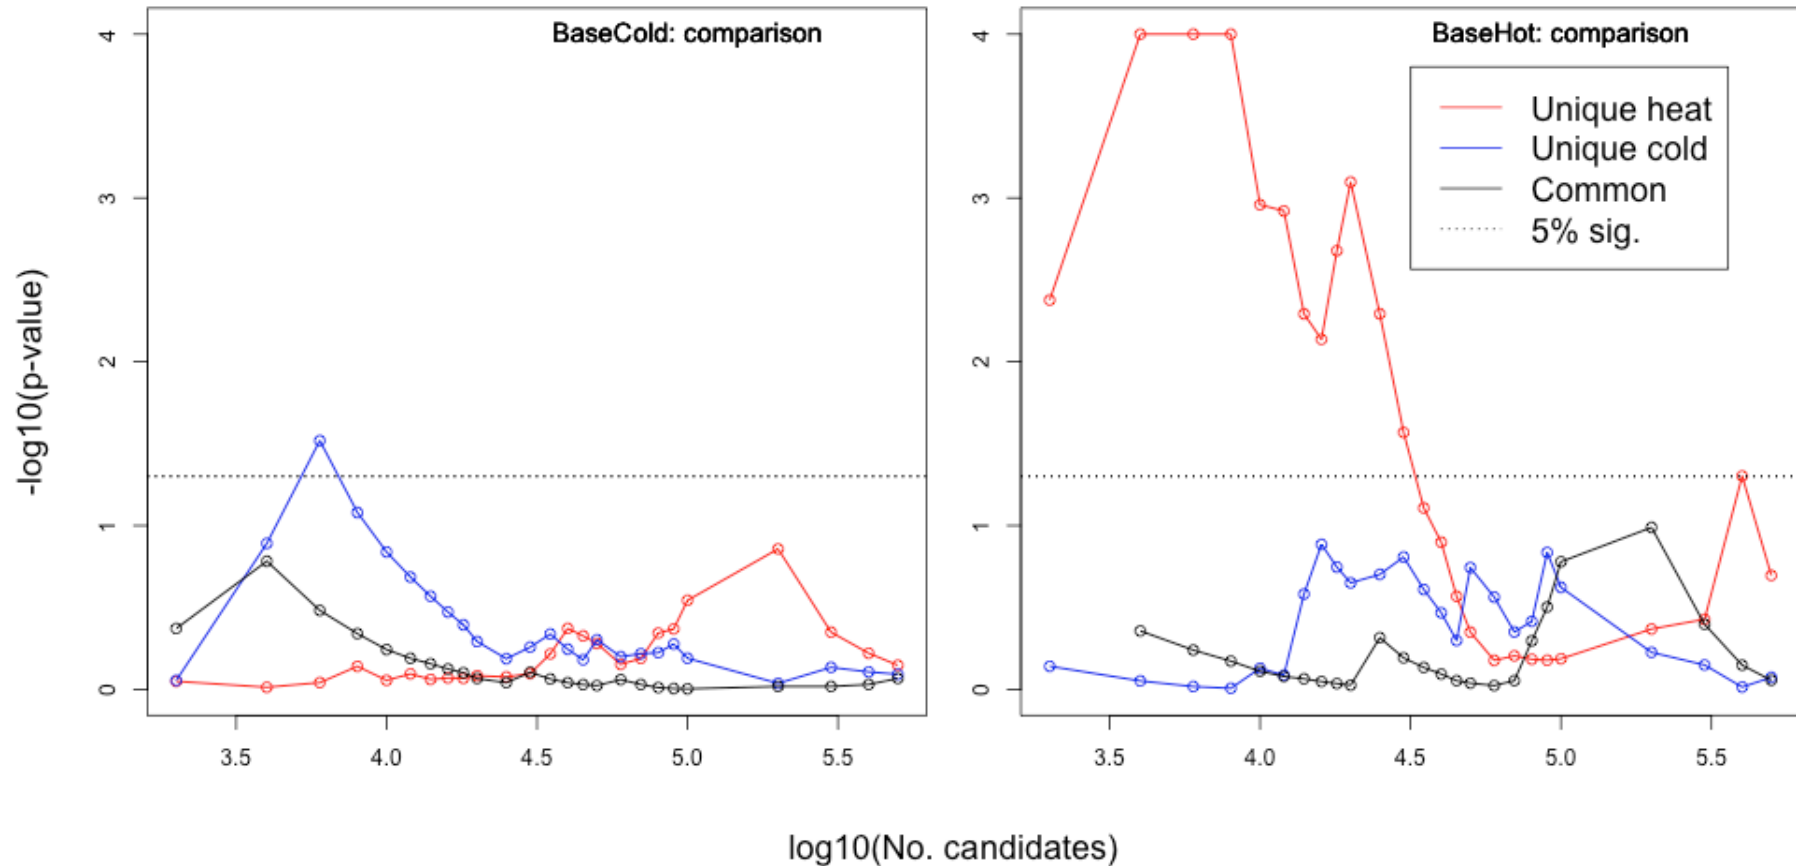

Figure S6. Enrichment of putatively selected SNPs from the cold (left panel) and hot (right panel) experimental populations in resistance genes unique to heat stress (red line), cold stress (blue line), or common to both stresses (black line). The common genes were taken as the intersection of heat and cold shock tolerance genes with significant associations from the CESAR database (<http://cesar.org.au>). The full common gene list comprised the following genes (CG names): "desat2" (CG5925), "Frost" (CG9434), "Glycerol 3 phosphate dehydrogenase" (CG9042), "Heat shock RNA omega" (CR31400), "Heat shock factor" (CG5748), "Heat shock protein 23" (CG4463), "Heat shock protein 26" (CG4183), "Heat shock protein cognate 4" (CG4264), "Heat shock protein 83" (CG1242), "mitochondrial acyl carrier protein 1" (CG9160), & "Pinocchio" (CG4710). See Tobler et al. (2014) for a detailed account of candidate SNP detection and enrichment tests, and for a full list of the unique genes.

## **Bibliography**

Ackerman, S. A. And J. A. Knox. 2013. Meteorology. Jones & Bartlett Publishers.

Tobler, R., S. U. Franssen, R. Kofler, P. Orozco-terWengel, V. Nolte, J. Hermisson, and C. Schlotterer. 2014. Massive habitat-specific genomic response in *D. melanogaster* populations during experimental evolution in hot and cold environments. Mol. Biol. Evol. 31:364 – 375.
